# Supplementary material for: Process integration for microalgal lutein and biodiesel production with concomitant flue gas CO2 sequestration: a biorefinery model for healthcare, energy and environment
Source: Royal Society of Chemistry journal article supplement (doi:10.1039/c5ra09306f), 2015-01-01
Supplement: c5ra09306f2.pdf [file c5ra09306f2.pdf]

## Supplementary data

### Process integration for microalgal lutein and biodiesel production with concomitant flue gas CO<sub>2</sub> sequestration: A biorefinery model for healthcare, energy and environment

R. Dineshkumar <sup>a</sup>, Sukanta Kumar Dash <sup>b</sup>, Ramkrishna Sen <sup>a,\*</sup>

<sup>a</sup> Department of Biotechnology, Indian Institute of Technology Kharagpur, India

<sup>b</sup> Department of Mechanical Engineering, Indian Institute of Technology Kharagpur, India

\* Corresponding author: E-mail address: [rksen@yahoo.com](mailto:rksen@yahoo.com); Tel: +91-3222-283752

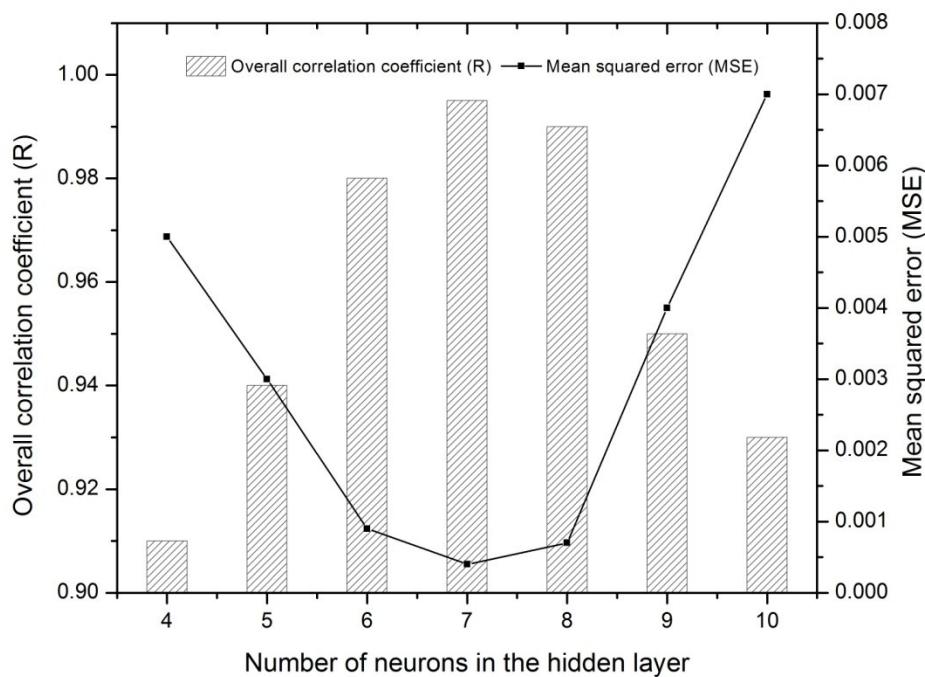

**Fig.A.1.** Effect of neuron number in the hidden layer on overall correlation coefficient and mean squared error

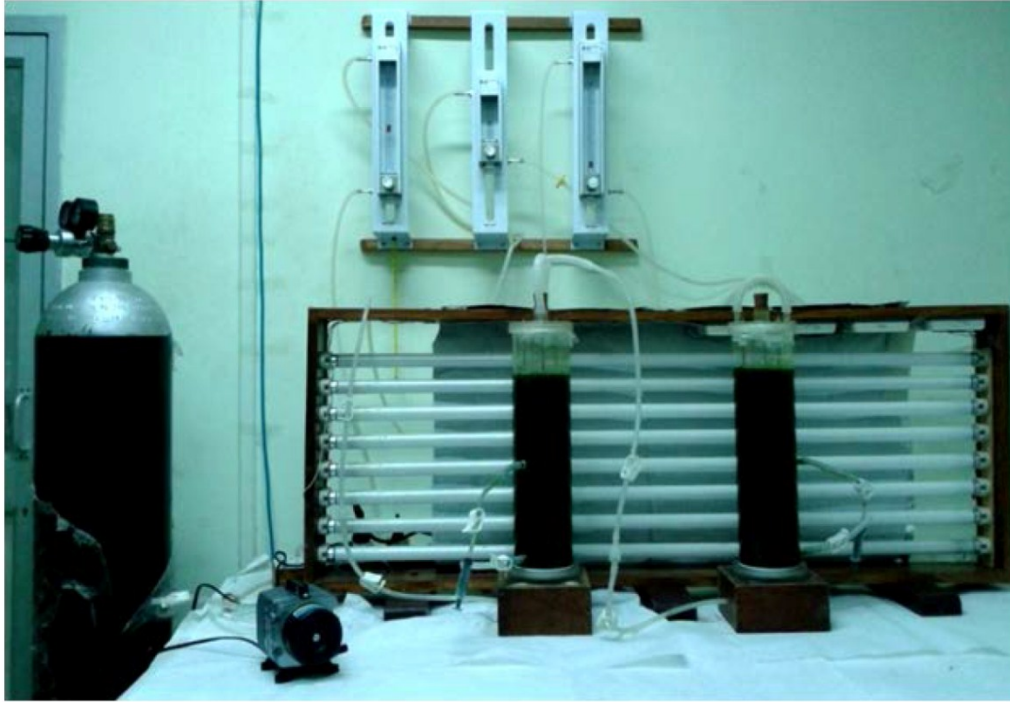

**Fig.A.2.** Experimental setup of CO<sub>2</sub> sequestration by *Chlorella minutissima* cultivated in a 2-L airlift photobioreactor under the optimized process conditions

**Table A.1.** Experimental range and levels of independent process variables

| Process variables                                        | Levels |     |     |      |      |
|----------------------------------------------------------|--------|-----|-----|------|------|
|                                                          | -2     | -1  | 0   | 1    | 2    |
| Light intensity ( $\mu\text{mol m}^{-2} \text{s}^{-1}$ ) | 50     | 100 | 175 | 250  | 300  |
| CO <sub>2</sub> (%)                                      | 0.8    | 2.5 | 5   | 7.5  | 9.2  |
| Flow rate ( $\text{mL min}^{-1}$ )                       | 395    | 600 | 900 | 1200 | 1404 |

**Table A.2.** The results of the validation experiments for the ANN model

| Light intensity ( $\mu\text{mol m}^{-2}\text{s}^{-1}$ ) | CO <sub>2</sub> (%) | Flow rate (mL min <sup>-1</sup> ) | ANN-predicted lutein productivity (mg L <sup>-1</sup> d <sup>-1</sup> ) | Experimentally determined lutein productivity (mg L <sup>-1</sup> d <sup>-1</sup> ) | % Error between predicted and experimental values |
|---------------------------------------------------------|---------------------|-----------------------------------|-------------------------------------------------------------------------|-------------------------------------------------------------------------------------|---------------------------------------------------|
| 200                                                     | 1                   | 1000                              | 2.88                                                                    | 2.79 ± 0.04                                                                         | 3.2                                               |
| 150                                                     | 4                   | 900                               | 3.19                                                                    | 3.28 ± 0.07                                                                         | 2.8                                               |
| 180                                                     | 5                   | 750                               | 3.75                                                                    | 3.64 ± 0.05                                                                         | 3.0                                               |

**Equation A.1**

$$\begin{aligned} \text{Response} = & -(6.10508) + (0.037626 * \text{Light}) + (0.942398 * \text{CO}_2) + (6.4016 * 10^{-03} * \text{Flow rate}) - \\ & (1.4533 * 10^{-03} * \text{Light} * \text{CO}_2) + (4.889 * 10^{-06} * \text{Light} * \text{Flow rate}) + (1.266 * 10^{-04} * \text{CO}_2 * \text{Flow rate}) \\ & - (6.2254 * 10^{-05} * \text{Light}^2) - (0.089687 * \text{CO}_2^2) - (4.06765 * 10^{-06} * \text{Flow rate}^2) \end{aligned}$$

**PSO syntax:**

```
function [xOpt,fval,exitflag,output,population,scores] = ...
    pso(fitnessfcn,nvars,Aineq,bineq,Aeq,beq,LB,UB,nonlcon,options)
% Find the minimum of a function using Particle Swarm Optimization.
%
% This is an implementation of Particle Swarm Optimization algorithm using
% the same syntax as the Genetic Algorithm Toolbox, with some additional
% options specific to PSO. Allows code-reusability when trying different
% population-based optimization algorithms. Certain GA-specific parameters
% such as cross-over and mutation functions will not be applicable to the
% PSO algorithm. Demo function included, with a small library of test
% functions. Requires Optimization Toolbox.
%
% In development, new features will be added regularly until this is made
% redundant by an official MATLAB PSO toolbox.
%
% S. Chen. Version 20100522.
% Available from http://www.mathworks.com/matlabcentral/fileexchange/25986
% Distributed under BSD license.
%
% Syntax:
% psodemo
% pso
% x = pso(fitnessfcn,nvars)
% x = pso(fitnessfcn,nvars,Aineq,bineq)
% x = pso(fitnessfcn,nvars,Aineq,bineq,Aeq,beq)
% x = pso(fitnessfcn,nvars,Aineq,bineq,Aeq,beq,LB,UB)
% x = pso(fitnessfcn,nvars,Aineq,bineq,Aeq,beq,LB,UB,nonlcon)
```

```

% x = pso(fitnessfcn,nvars,Aineq,bineq,Aeq,beq,LB,UB,nonlcon,options)
% x = pso(problem)
% [x, fval] = pso(...)
% [x, fval,exitflag] = pso(...)
% [x, fval,exitflag,output] = pso(...)
% [x, fval,exitflag,output,population] = pso(...)
% [x, fval,exitflag,output,population,scores] = pso(...)
%
% Description:
% psodemo
% Runs a demonstration of the PSO algorithm using test function specified
% by user.
%
% pso
% Runs a default demonstration using Rosenbrock's banana function.
%
% x = pso(fitnessfcn,nvars)
% Runs the particle swarm algorithm with no constraints and default
% options. fitnessfcn is a function handle, nvars is the number of
% parameters to be optimized, i.e. the dimensionality of the problem.
%
% x = pso(fitnessfcn,nvars,Aineq,bineq)
% Linear constraints, such that Aineq*x <= bineq. Soft boundaries only.
% Aineq is a matrix of size nconstraints x nvars, while b is a column
% vector of length nvars.
%
% x = pso(fitnessfcn,nvars,Aineq,bineq,Aeq,beq)
% Linear equality constraints, such that Aeq*x = beq. Soft boundaries only.
% If no inequality constraints exist, set Aineq and bineq to [].
%
% x = pso(fitnessfcn,nvars,Aineq,bineq,Aeq,beq,LB,UB)
% Lower and upper bounds defined as LB and UB respectively. Use empty
% arrays [] for A, b, Aeq, or beq if no linear constraints exist.
%
% x = pso(fitnessfcn,nvars,Aineq,bineq,Aeq,beq,LB,UB,nonlcon)
% Non-linear constraints. Nonlinear inequality constraints in the form c(x)
% <= 0 have now been implemented using 'soft' boundaries only. See the
% Optimization Toolbox documentation for the proper syntax for defining
% nonlinear constraints.
%
% x = pso(fitnessfcn,nvars,Aineq,bineq,Aeq,beq,LB,UB,nonlcon,options)
% Default algorithm parameters replaced with those defined in the options
% structure:
% Use >> options = pssoptimset('Param1','value1','Param2','value2',...) to
% generate the options structure. Type >> pssoptimset with no input or
% output arguments to display a list of available options and their
% default values.
%
% NOTE: the swarm will perform better if the PopInitRange option is defined
% so that it closely bounds the expected domain of the feasible region.
% This is automatically done for lower and upper bound constraints, but not
% for linear and nonlinear constraints.
%
% NOTE 2: If options.HybridFcn is to be defined, and if it is necessary to
% pass a non-default options structure to the hybrid function, then the
% options structure may be included in a cell array along with the pointer
% to the hybrid function. Example:

```

```

% >> % Let's say that we want to use fmincon to refine the result from PSO:
% >> hybridoptions = optimset(@fmincon) ;
% >> options.HybridFcn = {@fmincon, hybridoptions} ;
%
% x = pso(problem)
% Parameters imported from problem structure. Should work, but no error
% checking yet.
%
% [x, fval] = pso(...)
% Returns the fitness value of the best solution.
%
% [x, fval,exitflag] = pso(...)
% Returns information on outcome of pso run. Should match exitflag values
% for GA where applicable, for code reuseability.
%
% [x, fval,exitflag,output] = pso(...)
% The structure output contains more detailed information about the PSO
% run. Should match output fields of GA, where applicable.
%
% [x, fval,exitflag,output,population] = pso(...)
% A matrix population of size PopulationSize x nvars, with the locations of
% particles across the rows.
%
% [x, fval,exitflag,output,population,scores] = pso(...)
% Final scores of the particles in population.
%
% See also:
% PSODEMO, PSOOPTIMSET.

if ~nargin % Rosenbrock's banana function by default, as a demonstration
    fitnessfcn = @(x)100*(x(2)-x(1)^2)^2+(1-x(1))^2 ;
    nvars = 2 ;
    LB = [-1.5,-2] ;
    UB = [2,2] ;
    options.PopInitRange = [[-2;4],[-1;2]] ;
    options.PlotFcns = {@psoplotbestf,@psoplotswarmsurf} ;
    options.Generations = 200 ;
    options.DemoMode = 'on' ;
    options.KnownMin = [1 1] ;
elseif isstruct(fitnessfcn)
    nvars = fitnessfcn.nvars ;
    Aineq = fitnessfcn.Aineq ;
    bineq = fitnessfcn.bineq ;
    Aeq = fitnessfcn.Aeq ;
    beq = fitnessfcn.beq ;
    LB = fitnessfcn.LB ;
    UB = fitnessfcn.UB ;
    nonlcon = fitnessfcn.nonlcon ;
    if ischar(nonlcon) && ~isempty(nonlcon)
        nonlcon = str2func(nonlcon) ;
    end
    options = fitnessfcn.options ;
    % options.PlotFcns = {@psoplotbestf,@psoplotswarmsurf} ;
    fitnessfcn = fitnessfcn.fitnessfcn ;
elseif nargin < 2
    msg = 'PSO requires at least two input arguments' ;
    error('%s, or a problem structure. Type >> help pso for details',...

```

```

        msg)
end % if ~nargin

if ~exist('options','var') % Set default options
    options = struct ;
end % if ~exist

options = psoptimset(options) ;

options.Verbosity = 1 ; % For options.Display == 'final' (default)
if strncmpi(options.Display,'off',3)
    options.Verbosity = 0 ;
elseif strncmpi(options.Display,'iter',4)
    options.Verbosity = 2 ;
elseif strncmpi(options.Display,'diag',4)
    options.Verbosity = 3 ;
end

if ~exist('Aineq','var'), Aineq = [] ; end
if ~exist('bineq','var'), bineq = [] ; end
if ~exist('Aeq','var'), Aeq = [] ; end
if ~exist('beq','var'), beq = [] ; end
if ~exist('LB','var'), LB = [] ; end
if ~exist('UB','var'), UB = [] ; end
if ~exist('nonlcon','var'), nonlcon = [] ; end
% Check for constraints and bit string population type
if strncmpi(options.PopulationType,'bitstring',2)
    if ~isempty([Aineq,bineq]) || ~isempty([Aeq,beq]) || ...
        ~isempty(nonlcon) || ~isempty([LB,UB])
        Aineq = [] ; bineq = [] ; Aeq = [] ; beq = [] ; nonlcon = [] ;
        LB = [] ; UB = [] ;
        msg = sprintf('Warning: Constraints will be ignored') ;
        msg = sprintf('%s for options.PopulationType ' 'bitstring''',msg) ;
        disp(msg)
    end
end
% Change this when nonlcon gets fully implemented:
if ~isempty(nonlcon) && strcmpi(options.ConstrBoundary,'reflect')
    msg = 'Non-linear constraints don't have 'reflect' boundaries' ;
    warning('pso:main:nonlcon',...
        '%s implemented. Changing options.ConstrBoundary to 'soft''.',...
        msg)
    options.ConstrBoundary = 'soft' ;
end

% Is options.PopInitRange reconcilable with LB and UB constraints?
% -----
% Resize PopInitRange in case it was given as one range for all dimensions
if size(options.PopInitRange,2) == 1 && nvars > 1
    options.PopInitRange = repmat(options.PopInitRange,1,nvars) ;
end

% Check initial population with respect to bound constraints
% Is this really desirable? Maybe there are some situations where the user
% specifically does not want an uniform initial population covering all of
% LB and UB?
if ~isempty(LB) || ~isempty(UB)

```

```

options.LinearConstr.type = 'boundconstraints' ;
options.PopInitRange = ...
    psocheckpopulationinirange (options.PopInitRange, LB, UB) ;
end
% -----

% Check validity of VelocityLimit
if all(~isfinite(options.VelocityLimit))
    options.VelocityLimit = [] ;
elseif isscalar(options.VelocityLimit)
    options.VelocityLimit = repmat(options.VelocityLimit,1,nvars) ;
elseif ~isempty(length(options.VelocityLimit)) && ...
    ~isequal(length(options.VelocityLimit),nvars)
    msg = 'options.VelocityLimit must be either a positive scalar' ;
    error('%s, or a vector of size 1xnvars.',msg)
end % if isscalar
options.VelocityLimit = abs(options.VelocityLimit) ;

% Generate swarm initial state (this line must not be moved)
if strcmpi(options.PopulationType,'double',2)
    state = psocreationuniform(options,nvars) ;
elseif strcmpi(options.PopulationType,'bi',2)
    state = psocreationbinary(options,nvars) ;
end

% Check initial population with respect to linear and nonlinear constraints
% -----
if ~isempty(Aeq) || ~isempty(Aineq) || ~isempty(nonlcon)
    options.LinearConstr.type = 'linearconstraints' ;
    if ~isempty(nonlcon)
        options.LinearConstr.type = 'nonlinearconstraints' ;
    end
    if strcmpi(options.ConstrBoundary,'reflect')
        options.ConstrBoundary = 'soft' ;
        msg = sprintf('Constraint boundary behavior ''reflect''') ;
        msg = sprintf('%s is not yet supported for linear constraints.',...
            msg) ;
        msg = sprintf('%s Switching boundary behavior to ''soft''.',msg) ;
        warning('pso:mainfcn:constraintbounds',...
            '%s',msg)
    end
    [state,options] = psocheckinitialpopulation(state,...
        Aineq,bineq,Aeq,beq,...
        LB,UB,...
        nonlcon,...
        options) ;
end
% -----

n = options.PopulationSize ;
itr = options.Generations ;

if ~isempty(options.PlotFcns)
    close(findobj('Tag','Swarm Plots','Type','figure'))
    state.hfigure = figure('NumberTitle','off',...
        'Name','PSO Progress',...
        'Tag','Swarm Plots') ;
end

```

```

end % if ~isempty

if options.Verbosity > 0, fprintf('\nSwarming...'), end
exitflag = 0 ; % Default exitflag, for max iterations reached.
flag = 'init' ;

% Iterate swarm
state.fitnessfcn = fitnessfcn ;
state.LastImprovement = 1 ;
state.ParticleInertia = 0.9 ; % Initial inertia
% alpha = 0 ;
for k = 1:itr
    state.Score = inf*ones(n,1) ; % Reset fitness vector
    state.Generation = k ;
    state.OutOfBounds = false(options.PopulationSize,1) ;

    % Check bounds before proceeding
    % -----
    if ~all([isempty([Aineq,bineq]), isempty([Aeq,beq]), ...
            isempty([LB;UB]), isempty(nonlcon)])
        state = psocheckbounds(options, state, Aineq, bineq, Aeq, beq, ...
            LB, UB, nonlcon) ;
    end % if ~isempty
    % -----

    % Evaluate fitness, update the local bests
    % -----
    if strcmpi(options.Vectorized, 'off')
        for i = setdiff(1:n, find(state.OutOfBounds))
            state.Score(i) = fitnessfcn(state.Population(i,:)) ;
        end % for i
    else % Vectorized fitness function
        state.Score(setdiff(1:n, find(state.OutOfBounds))) = ...
            fitnessfcn(state.Population(setdiff(1:n, ...
                find(state.OutOfBounds)), :)) ;
    end % if strcmpi

    betterindex = state.Score < state.fLocalBests ;
    state.fLocalBests(betterindex) = state.Score(betterindex) ;
    state.xLocalBests(betterindex,:) = ...
        state.Population(betterindex,:) ;
    % -----

    % Update the global best and its fitness, then check for termination
    % -----
    [minfitness, minfitnessindex] = min(state.Score) ;

    %     alpha = alpha + (1/k) * ...
    %     ((1/n)*sum((state.Velocities*state.Velocities')^2) ./ ...
    %     ((1/n)*sum(state.Velocities*state.Velocities')).^2) ;
    %     tempchk = alpha <= 1.6 ;
    %     fprintf('\nFitness = %f', state.fGlobalBest);
    if minfitness < state.fGlobalBest
        state.fGlobalBest(k) = minfitness ;
        state.xGlobalBest = state.Population(minfitnessindex,:) ;
        state.LastImprovement = k ;
        imprvchk = k > options.StallGenLimit && ...

```



```

        (state.fGlobalBest(k - options.StallGenLimit) - ...
         state.fGlobalBest(k)) / (k - options.StallGenLimit) < ...
        options.TolFun ;
    if imprvchk
        exitflag = 1 ;
        flag = 'done' ;
    elseif state.fGlobalBest(k) < options.FitnessLimit
        exitflag = 2 ;
        flag = 'done' ;
    end % if k
else % No improvement from last iteration
    state.fGlobalBest(k) = state.fGlobalBest(k-1) ;
end % if minfitness
% fprintf('\n%d Fitness = %f',k, state.fGlobalBest);
mygen(k) = state.Generation;
myfitness(k) = state.fGlobalBest(k);

stallchk = k - state.LastImprovement >= options.StallGenLimit ;
if stallchk
    % No improvement for StallGenLimit generations
    exitflag = 3 ;
    flag = 'done' ;
end
% -----

% Update flags, state and plots before updating positions
% -----
if k == 2
    flag = 'iter' ;
elseif k == itr
    flag = 'done' ;
    exitflag = 0 ;
end

if ~isempty(options.PlotFcns) && ~mod(k,options.PlotInterval)
    % Exit gracefully if user has closed the figure
    if isempty(findobj('Tag','Swarm Plots','Type','figure'))
        exitflag = -1 ;
        break
    end % if isempty
    % Find a good size for subplot array
    rows = floor(sqrt(length(options.PlotFcns))) ;
    cols = ceil(length(options.PlotFcns) / rows) ;
    % Cycle through plotting functions
    if strcmpi(flag,'init')
        haxes = zeros(length(options.PlotFcns),1) ;
    end % if strcmpi
    for i = 1:length(options.PlotFcns)
        if strcmpi(flag,'init')
            haxes(i) = subplot(rows,cols,i,...
                'Parent',state.hfigure) ;
            set(gca,'NextPlot','replacechildren')
        else
            subplot(haxes(i))
        end % if strcmpi
        state = options.PlotFcns{i}(options,state,flag) ;
    end % for i
end

```

```

        drawnow
    end % if ~isempty

    if ~isempty(options.OutputFcns) && ~mod(k,options.PlotInterval)
        for i = 1:length(options.Output)
            state = options.OutputFcns{i}(options,state,flag) ;
        end % for i
    end % if ~isempty

    if strcmpi(flag,'done')
        break
    end % if strcmpi
    % -----

    % Update the particle velocities and positions
    state = psoiterate(state,options) ;
end % for k

% Assign output variables and generate output
% -----
xOpt = state.xGlobalBest ;
fval = state.fGlobalBest(k) ; % Best fitness value
% Final population: (hopefully very close to each other)
population = state.Population ;
scores = state.Score ; % Final scores (NOT local bests)
output.generations = k ; % Number of iterations performed
clear state
scatter(mygen, myfitness, 20, 'b', 'd');
output.message = psogenerateoutputmessage(options,output,exitflag) ;
if options.Verbosity > 0, fprintf('\n\n%s\n',output.message) ; end
% -----

% Check for hybrid function, run if necessary
% -----
if ~isempty(options.HybridFcn) && exitflag ~= -1
    [xOpt,fval] = psorunhybridfcn(fitnessfcn,xOpt,Aineq,bineq,...
        Aeq,beq,LB,UB,nonlcon,options) ;
end
% -----

% Wrap up
% -----
if options.Verbosity > 0
    if exitflag == -1
        fprintf('\nBest point found: %s\n\n',mat2str(xOpt,5))
    else
        fprintf('\nFinal best point: %s\n\n',mat2str(xOpt,5))
    end
end % if options.Verbosity

if ~nargout, clear all, end
% -----

```
